# Supplementary material for: Copper-based water repellent and antibacterial coatings by aerosol assisted chemical vapour deposition
Source: Royal Society of Chemistry journal article supplement (doi:10.1039/c6sc01150k), 2016-01-01
Supplement: c6sc01150k1.pdf [file c6sc01150k1.pdf]

Supplementary Information for

## Copper-based water repellent and antibacterial coatings by aerosol assisted chemical vapour deposition

Ekrem Ozkan,<sup>a</sup> Colin C. Crick,<sup>b</sup> Alaric Taylor,<sup>c</sup> Elaine Allan<sup>d</sup> and Ivan P. Parkin<sup>\*a</sup>

<sup>a</sup>Materials Chemistry Research Centre, Department of Chemistry, University College London, 20 Gordon St, London, WC1H 0AJ, UK. Email: [i.p.parkin@ucl.ac.uk](mailto:i.p.parkin@ucl.ac.uk), Tel: +44 (0)207 679 4669

<sup>b</sup>Department of Chemistry, Imperial College London, South Kensington Campus, SW7 2AZ, UK

<sup>c</sup>Department of Electronic and Electrical Engineering, University College London, Torrington Place, London, WC1E 7JE

<sup>d</sup>Division of Microbial Diseases, UCL Eastman Dental Institute, University College London, 256 Grays Inn Road, London, WC1X 8LD, UK

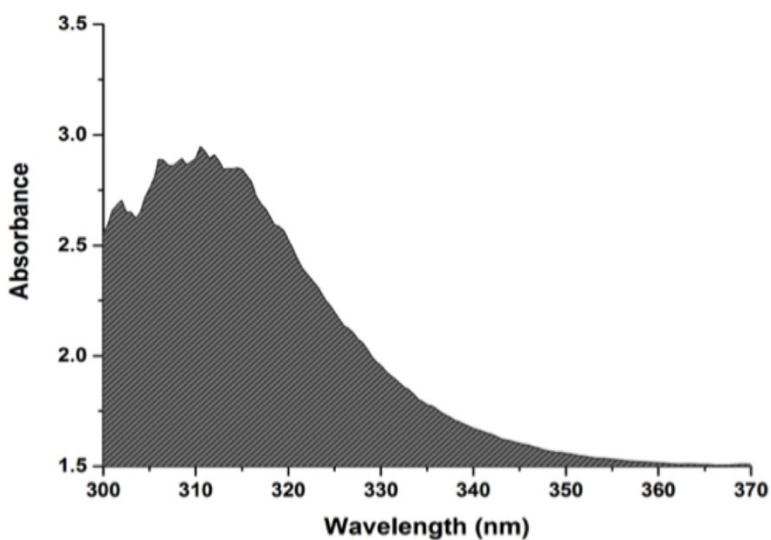

Fig. S1. UV-vis absorbance spectra of Cu-coated silicon polymer.

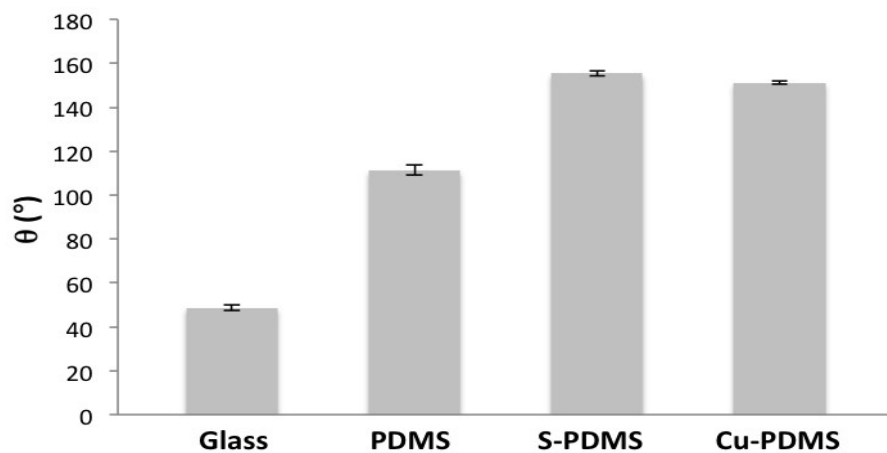

**Fig. S2.** Water contact angle of the samples. Error bars indicate standard deviations from five measurements.

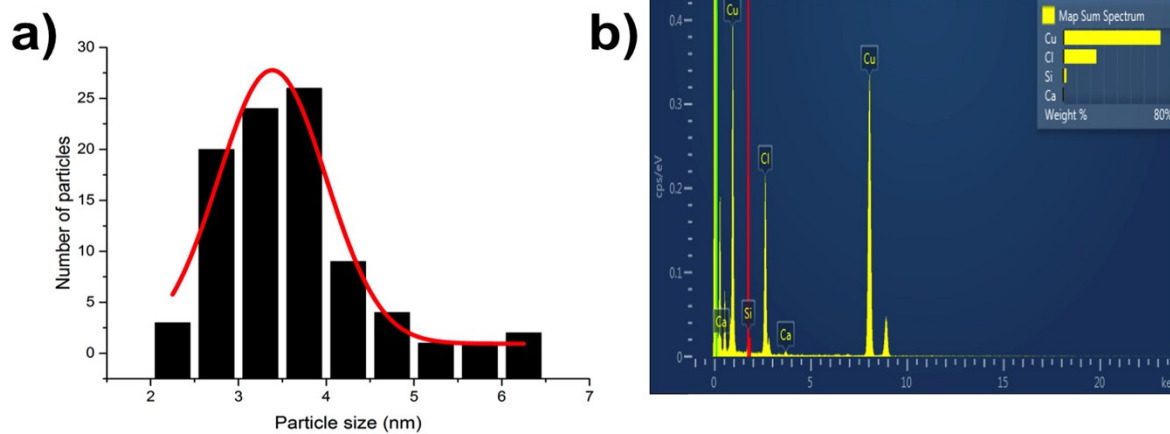

**Fig. S3.** (a) Particle size distribution histogram of colloidal Cu NPs. (b) energy dispersive X-ray spectrum of the Cu-PDMS composite.

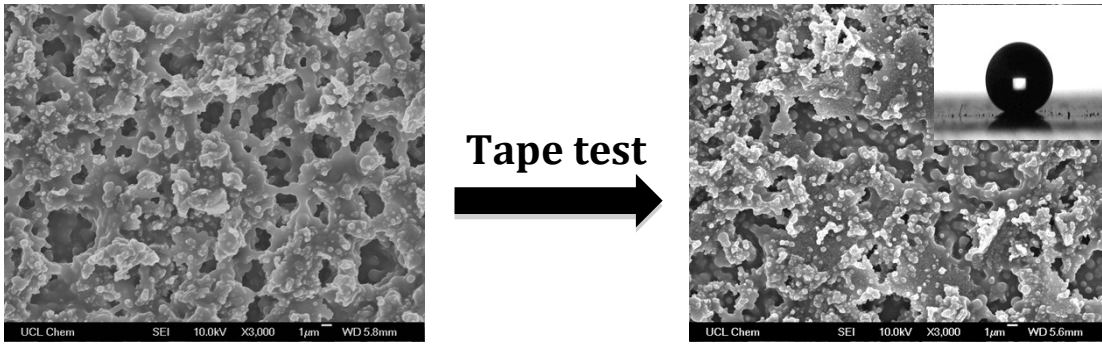

**Fig. S4.** SEM images of the Cu coated PDMS surface that was exposed to the tape test.
